# Supplementary material for: Preparation of Cu(ii) porphyrin–TiO2 composite in one-pot method and research on photocatalytic property
Source: Royal Society of Chemistry journal article supplement (doi:10.1039/c7ra09585f), 2017-01-01
Supplement: c7ra09585f1.pdf [file c7ra09585f1.pdf]

## Supporting Information

### **Preparation of Cu(II) porphyrin–TiO<sub>2</sub> composite in one– pot method and research on photocatalytic property**

Xin Zhao<sup>a, 1</sup>, Ying Wang<sup>a, 1</sup>, Wenhua Feng<sup>a</sup>, Hengtao Lei<sup>a</sup>, Jun Li<sup>a, \*</sup>

<sup>a</sup>Key Laboratory of Synthetic and Natural Functional Molecule Chemistry of Ministry of Education, College of Chemistry & Materials Science, Northwest University, Xi'an, Shaanxi 710069, PR China

<sup>1</sup>these authors contributed equally to this work

\*Correspondence author Tel: +0086 29 88302604; Fax: +0086 29 88303798

E-mail: [junli@nwu.edu.cn](mailto:junli@nwu.edu.cn)

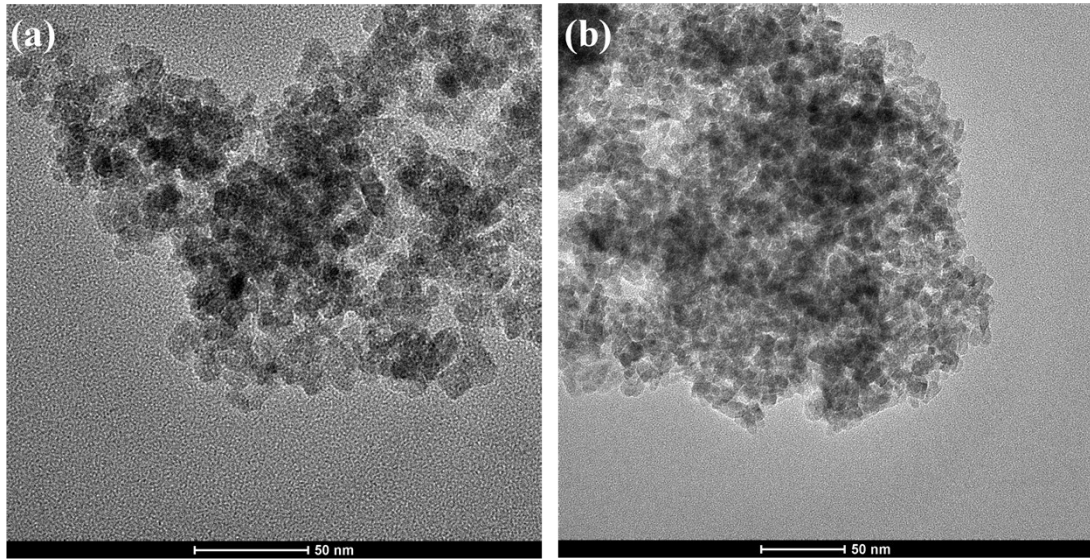

Fig. S1 Integral TEM images of (a) TiO<sub>2</sub>, (b) CuPp-TiO<sub>2</sub> photocatalyst.

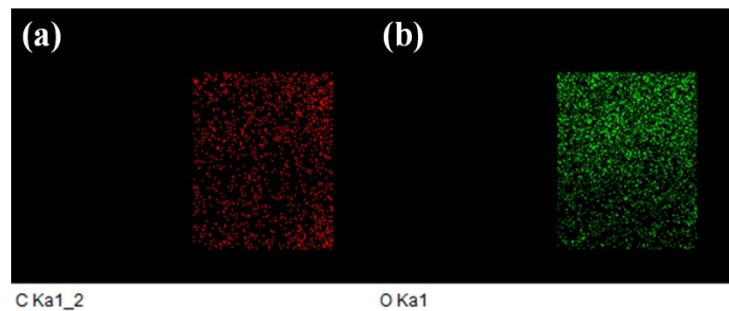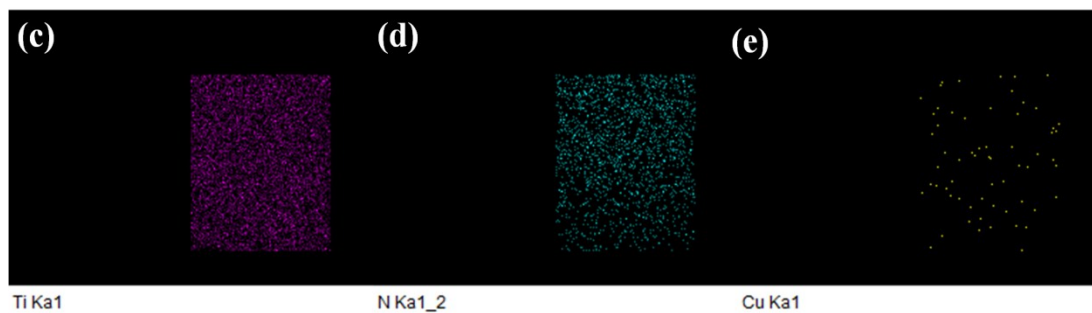

Fig. S2 Corresponding EDX element mapping of CuPp-TiO<sub>2</sub> composite photocatalyst (j) for carbon, (k) for, oxygen, (l) for titanium, (d) for nitrogen, (e) for copper.

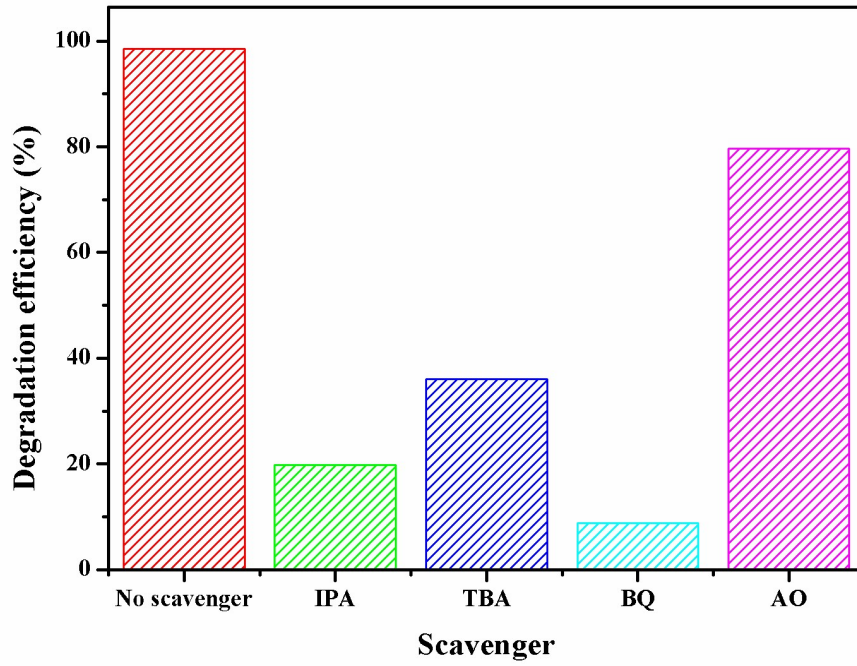

Fig. S3 The degradation efficiency of 4-NP in the presence of CuPp-TiO<sub>2</sub> composite photocatalyst with kinds of scavengers (Fig. S3).
